# Supplementary material
Source: bioRxiv or medRxiv preprint supplement (https://www.biorxiv.org/highwire/filestream/116583/field_highwire_adjunct_files/1/384172-2.pdf)
Supplement: Supplementary file [file 384172-2.pdf]

## **Additional file 2**

### **Non-coding Class Switch Recombination-related transcription in human normal and pathological immune responses**

Helena Kuri-Magaña<sup>1,2</sup>; Leonardo Collado-Torres<sup>3,4</sup>; Andrew E. Jaffe<sup>3,4,5,6</sup>; Humberto Valdovinos-Torres<sup>1</sup>; Marbella Ovilla-Muñoz<sup>1</sup>; Juan M Téllez-Sosa<sup>1</sup>; Laura C Bonifaz Alfonzo<sup>7</sup>; Jesús Martínez-Barnetche<sup>1\*</sup>

**Table S1: Selected SRA projects used to map IH boundaries**

| <b>SRA Study</b> | <b>Samples</b> | <b>Cell type</b>                  | <b>Study</b>                                                                                                                              | <b>Ref.</b>                |
|------------------|----------------|-----------------------------------|-------------------------------------------------------------------------------------------------------------------------------------------|----------------------------|
| <b>SRP020491</b> |                |                                   |                                                                                                                                           |                            |
|                  | SRR805725      | Circulating B cells (pre-vaccine) | Changes in gene expression profiles of circulating B cells after influenza vaccination in healthy human subjects                          | Henn AD, 2013 [15]         |
|                  | SRR805736      | Circulating B cells (pre-vaccine) |                                                                                                                                           |                            |
|                  | SRR805747      | Circulating B cells (pre-vaccine) |                                                                                                                                           |                            |
|                  | SRR805758      | Circulating B cells (pre-vaccine) |                                                                                                                                           |                            |
|                  | SRR805769      | Circulating B cells (pre-vaccine) |                                                                                                                                           |                            |
| <b>SRP021509</b> |                |                                   |                                                                                                                                           |                            |
|                  | SRR834979      | Tonsillar naive B cells           | EZH2 is required for germinal center formation and somatic EZH2 mutations promote lymphoid transformation                                 | Béguelin W, 2013 [16]      |
|                  | SRR834980      | Tonsillar naive B cells           |                                                                                                                                           |                            |
|                  | SRR834981      | Tonsillar naive B cells           |                                                                                                                                           |                            |
|                  | SRR834982      | Tonsillar naive B cells           |                                                                                                                                           |                            |
|                  | SRR834983      | Tonsillar Germinal Center B cells |                                                                                                                                           |                            |
|                  | SRR834984      | Tonsillar Germinal Center B cells |                                                                                                                                           |                            |
|                  | SRR834985      | Tonsillar Germinal Center B cells |                                                                                                                                           |                            |
|                  | SRR834986      | Tonsillar Germinal Center B cells |                                                                                                                                           |                            |
| <b>SRP033335</b> |                |                                   |                                                                                                                                           |                            |
|                  | SRR1038580     | Control CD19+ B cells             | Genome-wide expression profiling of B Lymphocytes reveals IL4R increase in allergic asthma                                                | Pascual M, 2014 [17]       |
|                  | SRR1038581     | Control CD19+ B cells             |                                                                                                                                           |                            |
|                  | SRR1038582     | Control CD19+ B cells             |                                                                                                                                           |                            |
| <b>SRP045500</b> |                |                                   |                                                                                                                                           |                            |
|                  | SRR1550988     | Healthy control B cells           | Next generation sequencing of human immune cell subsets across diseases                                                                   | Linsley PS, 2014 [18]      |
|                  | SRR1551042     | Healthy control B cells           |                                                                                                                                           |                            |
|                  | SRR1551049     | Healthy control B cells           |                                                                                                                                           |                            |
|                  | SRR1551070     | Healthy control B cells           |                                                                                                                                           |                            |
| <b>SRP048820</b> |                |                                   |                                                                                                                                           |                            |
|                  | SRR1609989     | Centrocyte                        | Enhancer Sequence Variants and Transcription Factor Deregulation Synergize to Construct Pathogenic Regulatory Circuits in B Cell Lymphoma | Koues OI et al., 2014 [19] |
|                  | SRR1609990     | Centrocyte                        |                                                                                                                                           |                            |
|                  | SRR1609991     | PB Activated B cells              |                                                                                                                                           |                            |
|                  | SRR1609992     | PB Activated B cells              |                                                                                                                                           |                            |

| <b>SRP051688</b> |                                   |                                                                                                                               |                       |  |
|------------------|-----------------------------------|-------------------------------------------------------------------------------------------------------------------------------|-----------------------|--|
| SRR1740034       | Primary B cells (pre-vaccine)     | A Cell-based Systems Biology Assessment of Human Blood to Monitor Immune Responses After Influenza Vaccination                | Hoek KL, 2013 [20]    |  |
| SRR1740062       | Primary B cells (pre-vaccine)     |                                                                                                                               |                       |  |
| <b>SRP055390</b> |                                   |                                                                                                                               |                       |  |
| SRR1812749       | Normal CD19+/CD27+ memory B-cells | Transcriptome analysis in chronic lymphocytic leukemia cells using RNA sequencing (RNA-seq)                                   | Kushwaha G, 2016 [21] |  |
| SRR1812750       | Normal CD19+/ IgD+ naive B-cells  |                                                                                                                               |                       |  |
| SRR1812751       | Normal CD19+ B-cells              |                                                                                                                               |                       |  |
| SRR1812752       | Normal CD19+ B-cells              |                                                                                                                               |                       |  |
| SRR1812753       | Normal CD19+ B-cells              |                                                                                                                               |                       |  |
| <b>SRP060715</b> |                                   |                                                                                                                               |                       |  |
| SRR2097512       | Purified normal B cells           | Gene expression and splicing alterations analyzed by high throughput RNA sequencing of chronic lymphocytic leukemia specimens | Unpublished           |  |
| SRR2097513       | Purified normal B cells           |                                                                                                                               |                       |  |
| SRR2097514       | Purified normal B cells           |                                                                                                                               |                       |  |
| SRR2097515       | Purified normal B cells           |                                                                                                                               |                       |  |
| SRR2097516       | Purified normal B cells           |                                                                                                                               |                       |  |

\*Data shown as it is displayed for each of the projects in the SRA

**Table S2. CSRnc transcription in cancer cell lines**

|                                 | Samples with High_expression | Samples with low/no expression | p_val*        | fdr**           |
|---------------------------------|------------------------------|--------------------------------|---------------|-----------------|
| Acute lymphocytic leukemia      | 6                            | 111                            | 0.4732        | 0.6310          |
| Acute monocytic leukemia        | 12                           | 142                            | 0.7540        | 0.9280          |
| <b>Acute myeloid leukemia</b>   | <b>2</b>                     | <b>185</b>                     | <b>0.0002</b> | <b>0.0003 *</b> |
| Prostate cancer                 | 13                           | 319                            | 0.0129        | 0.0206          |
| Pancreatic cancer               | 0                            | 58                             | 0.0207        | 0.0301          |
| <b>Colorectal cancer</b>        | <b>9</b>                     | <b>580</b>                     | <b>0.0000</b> | <b>0.0000 *</b> |
| <b>Breast cancer</b>            | <b>32</b>                    | <b>1417</b>                    | <b>0.0000</b> | <b>0.0000 *</b> |
| <b>Lung cancer</b>              | <b>0</b>                     | <b>462</b>                     | <b>0.0000</b> | <b>0.0000 *</b> |
| Gastric cancer                  | 3                            | 46                             | 1.0000        | 1.0000          |
| Adrenal cancer                  | 0                            | 3                              | 1.0000        | 1.0000          |
| <b>B cell lymphoma</b>          | <b>77</b>                    | <b>38</b>                      | <b>0.0000</b> | <b>0.0000 *</b> |
| <b>Astrocytoma</b>              | <b>1</b>                     | <b>534</b>                     | <b>0.0000</b> | <b>0.0000 *</b> |
| <b>Cervical cancer</b>          | <b>7</b>                     | <b>1613</b>                    | <b>0.0000</b> | <b>0.0000 *</b> |
| <b>Chronic myeloid leukemia</b> | <b>8</b>                     | <b>522</b>                     | <b>0.0000</b> | <b>0.0000 *</b> |
| <b>Osteosarcoma</b>             | <b>3</b>                     | <b>159</b>                     | <b>0.0034</b> | <b>0.0060 *</b> |
| Cholangiosarcoma                | 0                            | 7                              | 1.0000        | 1.0000          |

\* Exact Fisher's test. **Enriched.** **Depleted**

\*\* Benjamini-Hochberg post hoc correction for multiple comparisons.

**Table S3. Differential expression analysis in I<sub>H</sub> and C<sub>H</sub>**

| Project_ID | Description                         | Comparisson                        | Sample type  | coding |      |      |      |      |      |      |      |      |      | p-value * |      |      |       |       |      |      |      |      |      | non coding |      |  |  |  |
|------------|-------------------------------------|------------------------------------|--------------|--------|------|------|------|------|------|------|------|------|------|-----------|------|------|-------|-------|------|------|------|------|------|------------|------|--|--|--|
|            |                                     |                                    |              | Cμ     | Cδ   | Cγ3  | Cγ1  | Cα1  | Cγ2  | Cγ4  | Cε   | Cα2  | Iμ   | Iδ        | Iγ3  | Iγ1  | Iα1.1 | Iα1.2 | Iγ2  | Iγ4  | Iε   | Iα2  |      |            |      |  |  |  |
| SRP032775  | Malaria                             | Post-infection vs Pre-infection    | Whole blood  | 1.00   | 0.01 | 1.00 | 1.00 | 1.00 | 1.00 | 1.00 | 1.00 | 1.00 | 1.00 | 1.00      | 0.92 | 0.14 | 0.15  | 0.05  | 1.00 | 1.00 | 0.16 | 1.00 | 1.00 | 1.00       |      |  |  |  |
| SRP033696  | Influenza                           | H7N9 infection vs healthy controls | Whole blood  | 0.00   | 1.00 | 0.23 | 0.38 | 0.00 | 0.00 | 0.04 | 1.00 | 0.05 |      | 1.00      | 1.00 | 0.49 | 0.02  | 1.00  | 0.00 | 0.47 | 1.00 | 1.00 | 1.00 | 1.00       |      |  |  |  |
| SRP059039  | Pediatric diarrhea                  | <i>Shigella</i> vs Control         | Whole blood  | 0.98   | 0.03 | 1.00 | 1.00 | 1.00 | 1.00 | 1.00 | 1.00 | 1.00 |      | 0.03      | 0.74 | 0.13 | 0.01  | 1.00  | 0.89 | 0.51 | 0.03 | 1.00 | 1.00 | 1.00       |      |  |  |  |
| SRP059039  | Pediatric diarrhea                  | <i>Salmonella</i> vs Control       | Whole blood  | 1.00   | 1.00 | 1.00 | 1.00 | 1.00 | 0.55 | 1.00 | 1.00 | 1.00 |      | 1.00      | 1.00 | 0.03 | 0.08  | 1.00  | 1.00 | 0.05 | 0.25 | 1.00 | 1.00 | 1.00       |      |  |  |  |
| SRP059039  | Pediatric diarrhea                  | Rotavirus vs Control               | Whole blood  | 1.00   | 0.53 | 1.00 | 1.00 | 1.00 | 0.42 | 1.00 | 1.00 | 1.00 |      | 1.00      | 1.00 | 1.00 | 0.43  | 1.00  | 1.00 | 0.05 | 0.36 | 1.00 | 1.00 | 1.00       |      |  |  |  |
| SRP059172  | Brucellosis/Leishmaniasis infection | <i>Brucella</i> vs Control         | Whole blood  | 1.00   | 1.00 | 1.00 | 0.85 | 1.00 | 1.00 | 1.00 | 1.00 | 1.00 |      | 0.42      | 0.00 | 1.00 | 1.00  | 1.00  | 0.72 | 0.61 | 1.00 | 0.35 | 1.00 | 1.00       |      |  |  |  |
| SRP059172  | Brucellosis/Leishmaniasis infection | <i>Leishmania</i> vs Control       | Whole blood  | 1.00   | 0.00 | 0.07 | 0.01 | 0.76 | 0.57 | 0.05 | 1.00 | 0.34 |      | 1.00      | 1.00 | 0.20 | 0.47  | 1.00  | 1.00 | 0.01 | 1.00 | 0.48 | 1.00 | 1.00       |      |  |  |  |
| SRP042228  | Pediatric Crohn                     | Crohn's disease (iCD) vs Not-IBD   | Ileal biopsy | 0.00   | 1.00 | 0.01 | 0.01 | 0.00 | 0.00 | 0.00 | 1.00 | 0.00 |      | 0.00      | 0.03 | 1.00 | 1.00  | 0.01  | 0.54 | 0.91 | 1.00 | 1.00 | 0.02 | 1.00       |      |  |  |  |
| SRP042228  | Pediatric Crohn                     | Crohn's disease (cCD) vs Not-IBD   | Ileal biopsy | 0.32   | 1.00 | 0.14 | 0.14 | 0.07 | 0.02 | 0.02 | 1.00 | 0.04 |      | 0.14      | 0.28 | 1.00 | 1.00  | 1.00  | 1.00 | 1.00 | 1.00 | 1.00 | 1.00 | 1.00       | 1.00 |  |  |  |
| SRP042228  | Pediatric Crohn                     | Ulcerative colitis vs Not-IBD      | Ileal biopsy | 1.00   | 1.00 | 1.00 | 1.00 | 1.00 | 1.00 | 1.00 | 1.00 | 1.00 |      | 1.00      | 1.00 | 1.00 | 1.00  | 1.00  | 1.00 | 1.00 | 1.00 | 1.00 | 1.00 | 0.86       |      |  |  |  |
| SRP051688  | Influenza                           | Post-immune( day 7) vs preimmune   | B cells      | 1.00   | 1.00 | 1.00 | 0.07 | 1.00 | 1.00 | 1.00 | 1.00 | 0.89 |      | 1.00      | 1.00 | 1.00 | 1.00  | 1.00  | 1.00 | 1.00 | 1.00 | 1.00 | 1.00 | 1.00       | 1.00 |  |  |  |
| SRP020491  | Influenza                           | Post-immune( day 7) vs preimmune   | PBMC         | 1.00   | 1.00 | 1.00 | 0.27 | 1.00 | 1.00 | 0.95 | 1.00 | 1.00 |      | 1.00      | 1.00 | 1.00 | 1.00  | 1.00  | 1.00 | 1.00 | 1.00 | 1.00 | 1.00 | 1.00       | 1.00 |  |  |  |
| SRP062966  | Systemic Lupus Erythematosus (SLE)  | SLE patients vs healthy control    | Whole blood  | 1.00   | 1.00 | 0.99 | 0.56 | 0.19 | 1.00 | 1.00 | 1.00 | 0.31 |      | 0.93      | 0.82 | 1.00 | 1.00  | 1.00  | 1.00 | 1.00 | 0.39 | 1.00 | 0.48 | 0.77       |      |  |  |  |

\* p- value adjusted by Bonferroni. Values in green represent a significant decrease of expression compared to control. Values in red represent a significant increase of expression compared to control.
